# Supplementary material
Source: PubMed Central journal article supplement (PMC3570699)
Supplement: NIHMS432028-supplement-10858_2012_9698_MOESM1_ESM.pdf [file NIHMS432028-supplement-10858_2012_9698_MOESM1_ESM.pdf]

# Supplemental Information:

## Exploring Signal-to-noise Ratio and Sensitivity in Non-Uniformly Sampled Multi-Dimensional NMR Spectra

Sven G. Hyberts, Scott A. Robson and Gerhard Wagner\*

Contribution from Harvard Medical School, Boston, MA 02115, USA

<sup>1</sup>*Department of Biological Chemistry and Molecular Pharmacology, Harvard Medical School, 240 Longwood Avenue, Boston, Massachusetts 02115, USA.*

\*E-mail: [Gerhard\\_Wagner@hms.harvard.edu](mailto:Gerhard_Wagner@hms.harvard.edu)

Submitted to JBNMR 12/13/2012

TITLE RUNNING HEAD: SNR and sensitivity in NUS NMR

**Supplementary Table 1:** Comparison of the accuracy of peak heights between different sampling procedures and hmsIST reconstruction. The same spectrum as in Fig. 1 was used but simulated with 100 sets of random noise using different seed numbers. As can be seen the standard deviation for the peak height does not decrease with time-equivalent sparse sampling.

|          | Peak #1     | Peak #2     | Peak #3    | Peak #4    |
|----------|-------------|-------------|------------|------------|
| No noise | 288         | 144         | 72         | 36         |
| 100% US  | 287.9 ± 6.9 | 144.1 ± 6.4 | 71.8 ± 6.1 | 35.5 ± 6.2 |
| 25% NUS  | 287.0 ± 5.0 | 143.2 ± 5.9 | 67.1 ± 5.7 | 31.3 ± 6.6 |
| 10% NUS  | 291.6 ± 6.8 | 138.7 ± 6.0 | 64.9 ± 6.4 | 22.9 ± 7.0 |

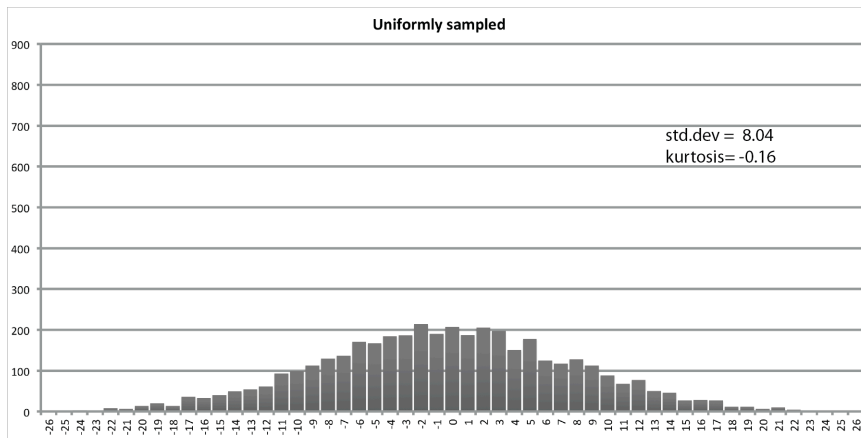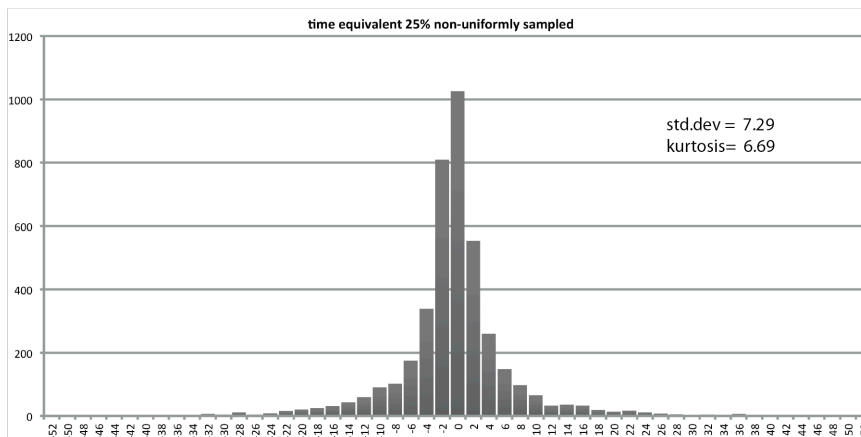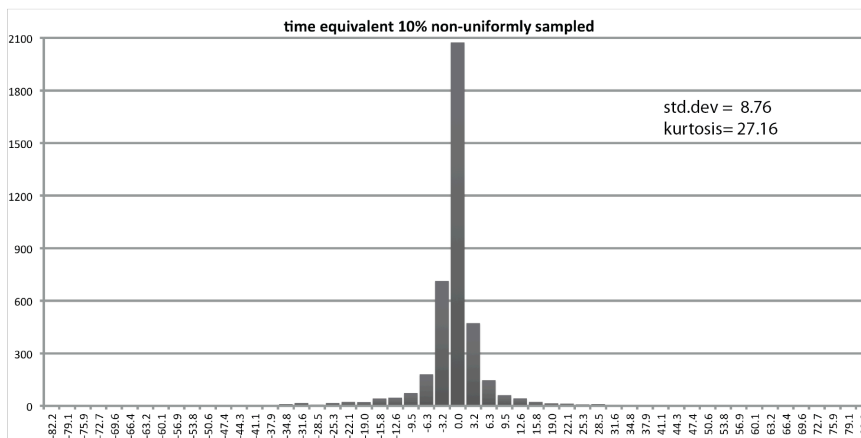

**Supplemental Figure S1:** Histogram of the noise distribution in US and NUS spectra. The histogram provides values for standard deviation (rms) and normalized kurtosis. As a kurtosis of a Gaussian distribution is 3.0 we have subtracted a number of 3.0 to obtain a normalized kurtosis and see the deviation from a Gaussian distribution. Kurtosis values  $> 0$  indicate a narrower, sharper distribution. The data are obtained on the 2k complex data set in figure 1b-d.

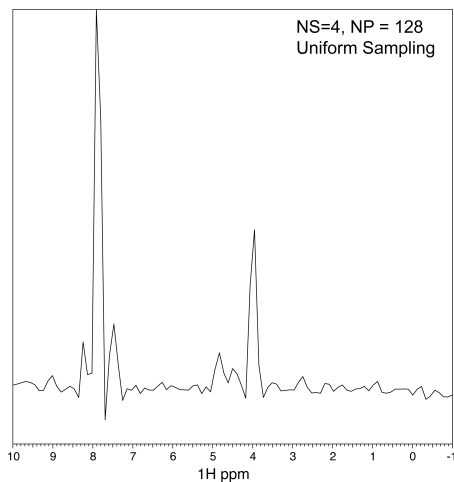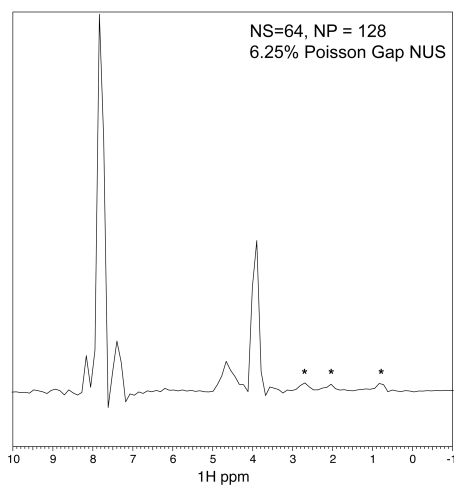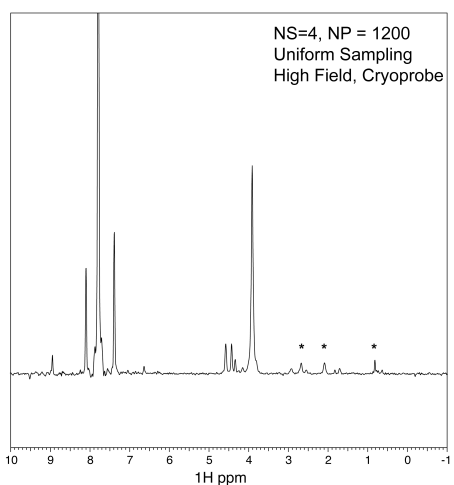

**Supplemental Figure S2:** Comparison of the 1D slices from panels Fig. 2E ( $64^{15}\text{N} \times 128^1\text{H}$  points, NS = 4, 500 MHz, RT probe) and 2F ( $6.25\%$  sampled from  $64^{15}\text{N} \times 128^1\text{H}$  points, NS = 64, 500 MHz, RT probe) with the corresponding slice from a high resolution uniformly sampled spectrum ( $64^{15}\text{N} \times 1200^1\text{H}$  points at 900 MHz and cryoprobe). Thus, the peaks labeled with “\*” in Fig. 2F correspond to real peaks.
